# Supplementary material for: Impact of Glycan Linkage to Staphylococcus aureus Wall Teichoic Acid on Langerin Recognition and Langerhans Cell Activation
Source: PubMed Central journal article supplement — ACS Infect Dis. 2021 Feb 16;7(3):624–35. doi: 10.1021/acsinfecdis.0c00822 (PMC8023653; doi:10.1021/acsinfecdis.0c00822), 2021-02-16
Supplement: id0c00822_si_001.pdf [file id0c00822_si_001.pdf]

**The impact of *Staphylococcus aureus* cell wall glycosylation on langerin recognition and  
Langerhans cell activation**

Astrid Hendriks, Rob van Dalen, Sara Ali, David Gerlach, Gijsbert A. van der Marel, Felix F. Fuchsberger, Piet Aerts, Carla J.C. de Haas, Andreas Peschel, Christoph Rademacher, Jos A.G. van Strijp, Jeroen D.C. Codée, Nina M. van Sorge

**Supporting information**

List of materials included:

- Table S1
- Supporting figures 1-3

**Table S1 Bacterial strains used in this study**

| <b>Strain (sequence type, clonal complex)</b> | <b>Source</b>           |
|-----------------------------------------------|-------------------------|
| N315 WT (ST5, CC5)                            | NARSA strain collection |
| N315 $\Delta tarS$                            | (1)                     |
| N315 $\Delta tarP$                            | (1)                     |
| N315 $\Delta tarS\Delta tarP$                 | (1)                     |
| N315 $\Delta tarS\Delta tarP+pRB474-tarS$     | This study              |
| N315 $\Delta tarS\Delta tarP+pRB474-tarP$     | This study              |
| RN4220 WT (ST8, CC8)                          | (2)                     |
| RN4220 $\Delta dltA$                          | (3)                     |
| RN4220 $\Delta tarM\Delta tarS$               | (4)                     |
| RN4220 $\Delta tarM\Delta tarS+pRB474-tarS$   | (4)                     |
| RN4220 $\Delta tarM\Delta tarS+pRB474-tarP$   | (1)                     |
| RN4220 $\Delta tarM\Delta tarS+pRB474-tarM$   | (4)                     |

A

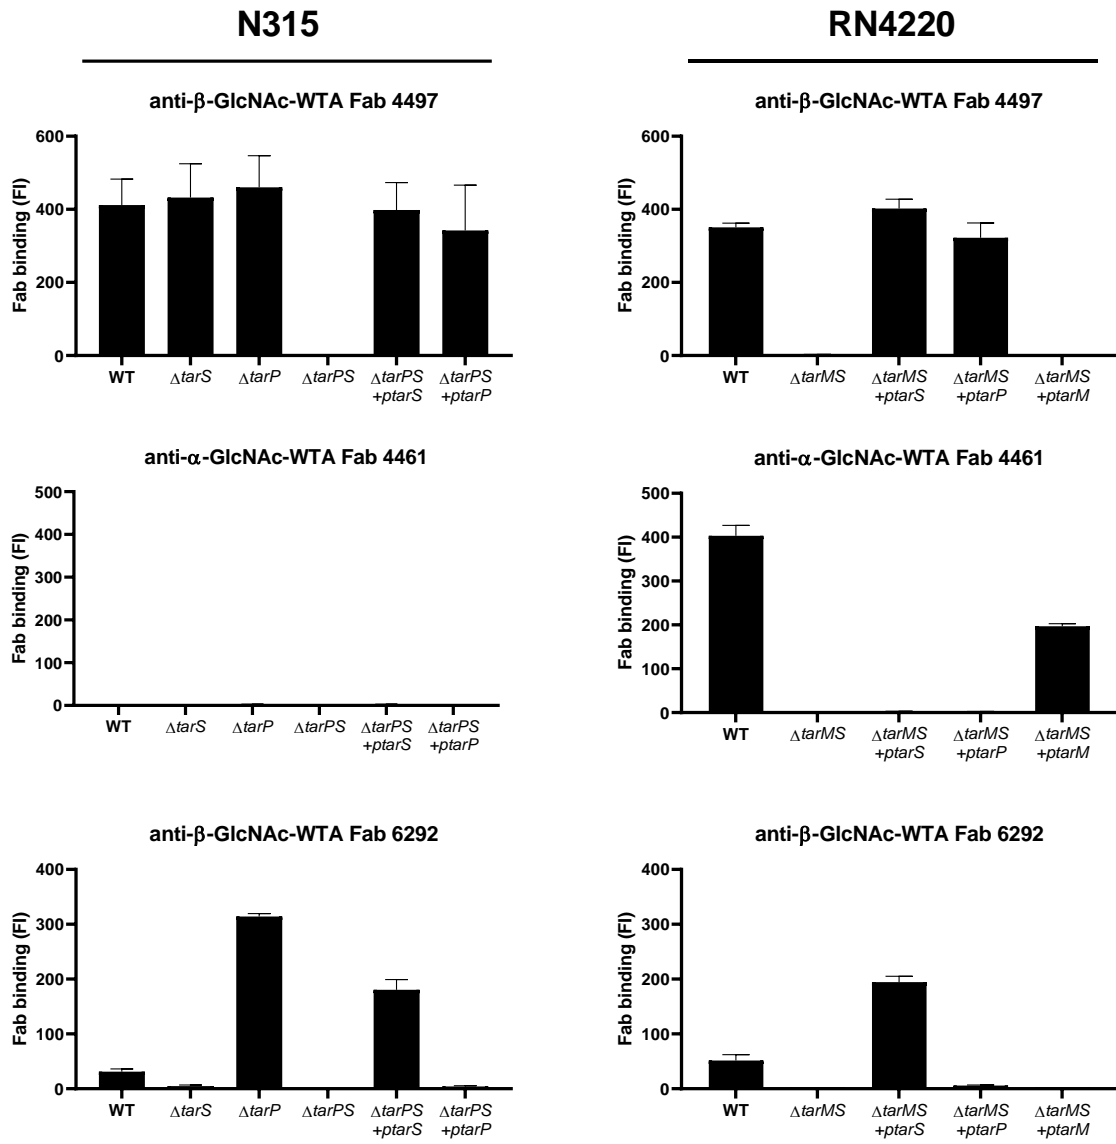

B

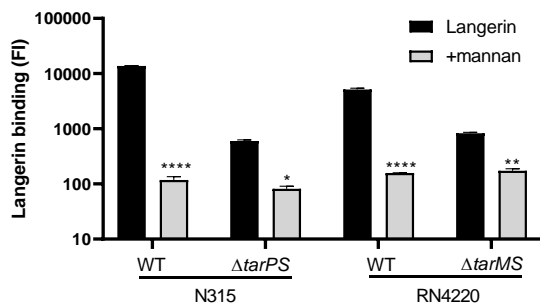

C

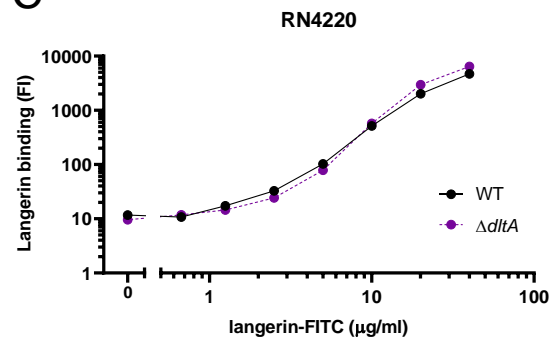

**Supporting Figure 1** A) Binding of Fab specific for  $\alpha$ -GlcNAc-WTA (4461),  $\beta$ -GlcNAc-WTA (4497) and  $\beta$ -1,4-GlcNAc-WTA (6292) to N315 (left) and RN4220 (right) mutant panels. B) Binding of recombinant langerin-FITC (40  $\mu$ g/ml) to N315 WT, N315  $\Delta tarS\Delta tarP$ , RN4220 WT and RN4220  $\Delta tarM\Delta tarS$  in the presence or absence of mannan (20  $\mu$ g/ml). C) Binding of recombinant langerin-FITC (0.6-40  $\mu$ g/ml) to RN4220 wt and  $\Delta dltA$ . Data is depicted as geometric mean fluorescence intensity (MFI) + standard error of mean (SEM) of biological triplicates. \* $p < 0.05$ , \*\* $p < 0.01$ , \*\*\*\* $p < 0.0001$

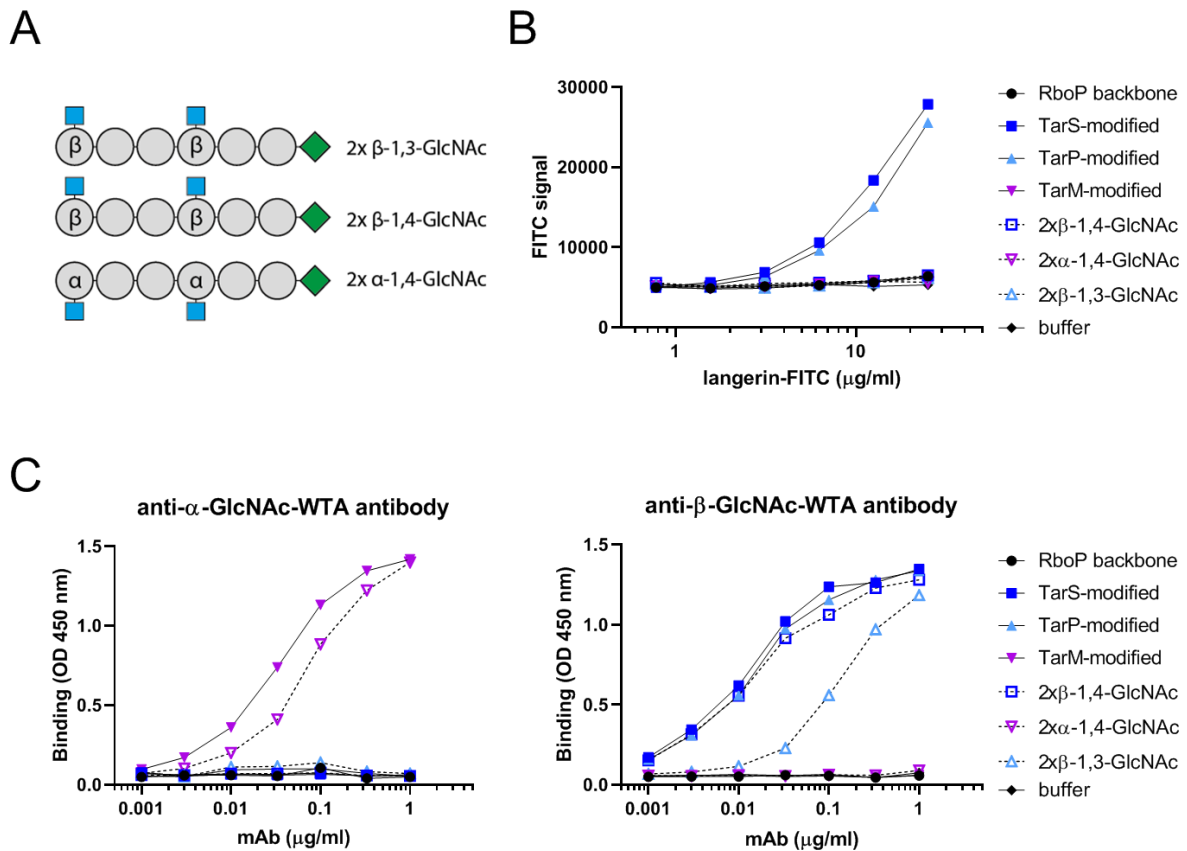

**Supporting figure 2** A) Schematic overview of fully synthetic WTA oligomers. Grey circles indicate RboP subunit, blue square represents GlcNAc, green diamond indicates biotin tag,  $\alpha$  and  $\beta$  indicate the type of linkage of GlcNAc to RboP subunit. B) Binding of recombinant langerin-FITC (0.8-25  $\mu\text{g/ml}$ ) to *in vitro*-glycosylated RboP hexamers, fully synthetic WTA oligomers and RboP backbone. C) Binding of monoclonal antibodies (0.001-1  $\mu\text{g/ml}$ ) specific for  $\alpha$ -GlcNAc-WTA (4461) and  $\beta$ -GlcNAc-WTA (4497) to the same panel of WTA oligomers as in B, followed by anti-human IgG-HRP staining. Data for panel B is shown as fluorescence signal, for C the absorbance at 450nm.

A

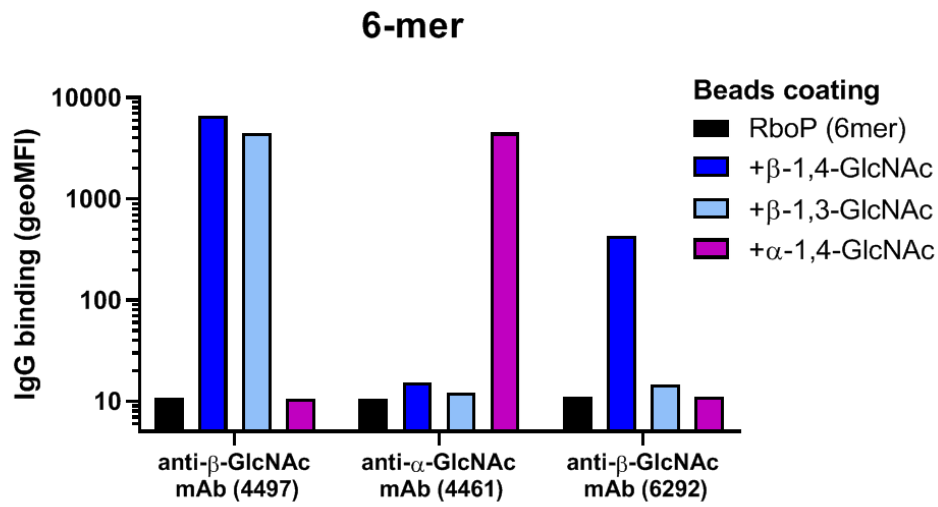

B

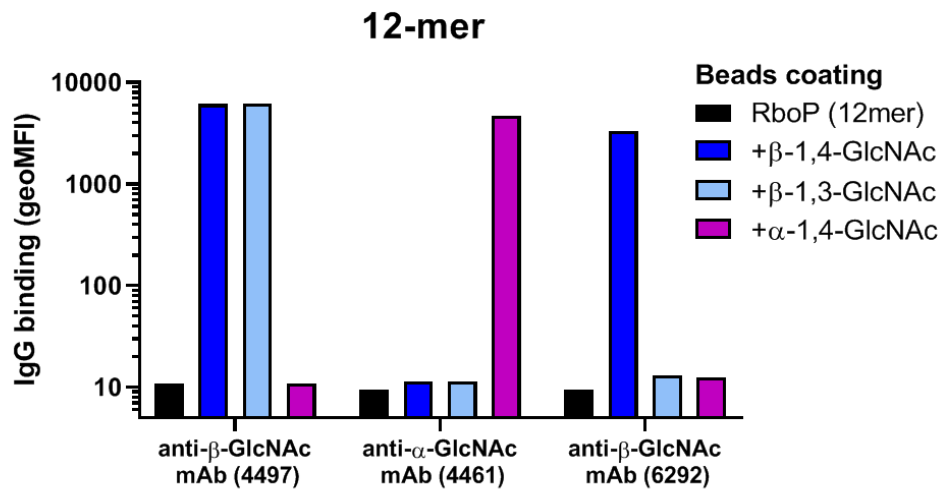

**Supporting figure 3** Binding of monoclonal antibodies (3 μg/ml) specific for α-GlcNAc-WTA (4461), β-GlcNAc-WTA (4497) and β-1,4-GlcNAc-WTA (6292) to beads coated with (A) RboP hexamers and (B) RboP dodecamers, *in vitro*-glycosylated by TarS, TarP or TarM. Unglycosylated RboP fragments are included as controls, binding is shown as geometric mean fluorescence intensity, after staining with goat anti-human kappa-Alexa Fluor 647.

1. Gerlach, D., Guo, Y., De Castro, C., Kim, S. H., Schlatterer, K., Xu, F. F., Pereira, C., Seeberger, P. H., Ali, S., Codée, J., Sirisarn, W., Schulte, B., Wolz, C., Larsen, J., Molinaro, A., Lee, B. L., Xia, G., Stehle, T., and Peschel, A. (2018) Methicillin-resistant *Staphylococcus aureus* alters cell wall glycosylation to evade immunity. *Nature*. **563**, 705–709
2. Kreiswirth, B. N., Löfdahl, S., Betley, M. J., O’reilly, M., Schlievert, P. M., Bergdoll, M. S., and Novick, R. P. (1983) The toxic shock syndrome exotoxin structural gene is not detectably transmitted by a prophage. *Nature* **305**, 709–712
3. Peschel, A., Otto, M., Jack, R. W., Kalbacher, H., Jung, G., and Götz, F. (1999) Inactivation of the *dlt* operon in *Staphylococcus aureus* confers sensitivity to defensins, protegrins, and other antimicrobial peptides. *J. Biol. Chem.* **274**, 8405–8410
4. Winstel, V., Liang, C., Sanchez-Carballo, P., Steglich, M., Munar, M., Broker, B. M., Penadés, J. R., Nübel, U., Holst, O., Dandekar, T., Peschel, A., and Xia, G. (2013) Wall teichoic acid structure governs horizontal gene transfer between major bacterial pathogens. *Nat. Commun.* **4**, 2345
